# Supplementary material for: Structural and defect engineering of cobaltosic oxide nanoarchitectures as an ultrahigh energy density and super durable cathode for Zn-based batteries
Source: PubMed Central journal article supplement — Chem Sci. 2019 Jun 24;10(32):7600–9. doi: 10.1039/c9sc01902b (PMC6761872; doi:10.1039/c9sc01902b), 2019-06-24
Supplement: SC-010-C9SC01902B-s001.pdf [file SC-010-C9SC01902B-s001.pdf]

## Supporting Information

### Structural and Defect Engineering of Cobaltic Oxide Nanoarchitectures as Ultrahigh Energy Density and Super Durable Cathode for Zn-based Batteries

Chunlin Teng, Fan Yang, Minghui Sun, Keshu Yin, Qintong Huang, Guangying Fu, Chuanqi Zhang, Xihong Lu\*, and Jiuxing Jiang\*

#### Calculation

##### *Special Capacity, energy density and power density*

The specific capacity  $C_m$  (mAh g<sup>-1</sup>) were calculated from the discharge curve using the following equations:

$$C_m = \frac{\int_0^{\Delta t} I \times dt}{m} \quad (\text{Equation S1})$$

Where  $I$  (mA) is the applied discharging current,  $\Delta t$  (h) is the discharging time and  $m$  (g) is the mass of active material.

The specific energy density  $E$  (Wh kg<sup>-1</sup>) and power density  $P$  (W kg<sup>-1</sup>) of the cell were obtained from the following equations:

$$E = C_m \times \Delta V \quad (\text{Equation S2})$$

$$P = \frac{E}{\Delta t} \quad (\text{Equation S3})$$

Where  $C_m$  is the specific capacity obtained from Equation (1) and  $\Delta V$  (V) is working potential, and  $\Delta t$  (h) is the discharging time.

##### *Electrochemically Active Surface Area (EASA)*

The EASA for each system was estimated from the electrochemical double-layer capacitance of the electrode surface by CV method. The CV test at different scan rate in a potential range of 0.1 V where no apparent faradaic processes occur. The double-layer charging current  $i_c$  is equal to the product of the scan rate  $\nu$ , and the electrochemical double-layer capacitance  $C_{dl}$ , as given by equation S4:

$$i_c = \nu C_{dl} \quad (\text{Equation S4})$$

The anodic charging current ( $i$ ) measured at one potential in CV curves as a function of the scan rate ( $\nu$ ) for all electrodes. The slope of anodic charging current densities-scan rate curve is in direct equal to  $C_{dl}$ , which proportion to EASA.

$$EASA = \frac{C_{dl}}{C_s} \quad (\text{Equation S5})$$

Where  $C_s$  is the specific capacitance measured for the sample with an atomically smooth planar surface, approximately  $60 \mu\text{F cm}^{-2}$ .

### ***Potentiostatic intermittent titration technique (PITT)***

The ion diffusion for the PITT experiment can be modeled as one-dimensional transport based on Fick's second law (Equation S6):

$$\frac{\partial C_i}{\partial x} = D \frac{\partial^2 C_i}{\partial x^2} \quad (\text{Equation S6})$$

Where  $x$  is the distance of ion moving from the electrolyte into the electrode,  $C_i$  is ion concentration at  $x$  and time  $t$ , and  $D$  is the chemical diffusion coefficient. In PITT measurement, a potentiostatic current transient was measured upon addition of a very small potential step (10 mV in this work). The transient current versus time can be approximately expressed as (Equation S7):

$$I(t) = \frac{2QD}{L^2} \exp\left(-\frac{\pi^2 Dt}{4L^2}\right) \quad (\text{Equation S7})$$

Where  $Q$  is the total charge transferred during a potential step and  $L$  is the thickness of the electrode ( $0.6 \mu\text{m}$  for our electrodes). The value of  $D$  can be calculated based on the logarithmic function of  $I(t)$  (equation S8):

$$D = -\frac{d \ln(I) 4L^2}{dt \pi^2} \quad (\text{Equation S8})$$

### ***Density functional theory (DFT) calculation***

The Vienna Ab-initio Software Package (VASP) is used to performed density functional theory (DFT). The interaction between the valence electrons and effects of core electrons are describe with the projector augmented wave (PAW) method. Generalized gradient approximation (GGA) with the Perdew-Burke-Ernzerhof (PBE) is some time used as the exchange and correlation energy. The plane wave is set to an energy of 600 eV. To model the surface of  $\text{M-Co}_3\text{O}_4$  and oxygen-vacancy  $\text{M-Co}_3\text{O}_{4-x}$ , we use a  $(2 \times 2)$  periodic slab models with four atomic layers combined with a  $15 \text{ \AA}$  vacuum layer along the  $Z$  axis to eliminate the interaction between the slabs. The Monkhorst K-point grid of  $5 \times 5 \times 1$  grid was employed in the surface. In the slab calculations, the atoms in the top layer of the slab are allowed to relax and other bottom atoms are fixed. The atomic relaxation will be stop as soon as the energies within  $1.0 \times 10^{-5} \text{ eV/atom}$  for total energy and the same the force on each atom is smaller than  $0.01 \text{ eV/\AA}$  for force on every atom.

## Supplementary Tables

**Table S1.** BET, pore size distribution and pore volume of samples

| Sample                                        | BET <sup>a</sup><br>(m <sup>2</sup> g <sup>-1</sup> ) | Pore size distribution<br><sup>b</sup> (nm) | Pore volume <sup>c</sup><br>(cm <sup>3</sup> g <sup>-1</sup> ) |
|-----------------------------------------------|-------------------------------------------------------|---------------------------------------------|----------------------------------------------------------------|
| KIT-6                                         | 744                                                   | 5~13                                        | 1.16                                                           |
| KIT-6/Co <sub>3</sub> O <sub>4</sub>          | 417                                                   | 5.5~7.5                                     | 0.63                                                           |
| M-Co <sub>3</sub> O <sub>4</sub>              | 144                                                   | 2~5                                         | 0.21                                                           |
| M-Co <sub>3</sub> O <sub>4-x</sub><br>(205°C) | 143.7                                                 | 2~5                                         | 0.22                                                           |
| M-Co <sub>3</sub> O <sub>4-x</sub><br>(230°C) | 129                                                   | 2~5                                         | 0.204                                                          |
| M-Co <sub>3</sub> O <sub>4-x</sub><br>(250°C) | 139                                                   | 2~5                                         | 0.21                                                           |
| M-Co <sub>3</sub> O <sub>4-x</sub><br>(275°C) | 130                                                   | 2~7                                         | 0.234                                                          |
| M-Co <sub>3</sub> O <sub>4-x</sub><br>(300°C) | 67                                                    | 2-7                                         | 0.155                                                          |
| Co <sub>3</sub> O <sub>4</sub>                | 7                                                     | -                                           | -                                                              |
| Co <sub>3</sub> O <sub>4-x</sub>              | 6.3                                                   | -                                           | -                                                              |

a: the Brunauer–Emmett–Teller (BET) method using the data in the relative pressure range of 0.05~0.15.

b: Pore size distributions (PSDs) were obtained from the adsorption isotherms using BJH mode.

c: The total pore volumes ( $V_{total}$ ) were calculated from the N<sub>2</sub> adsorption amount at  $P/P_0 = 0.995$ .

**Table S2.** Comparison of electrochemical performance of reported Zn-ion batteries

| Battery                                | Specific Capacity<br>(mAh g <sup>-1</sup> )         | Cycling<br>performance               | Ref.      |
|----------------------------------------|-----------------------------------------------------|--------------------------------------|-----------|
| Zn//M-Co <sub>3</sub> O <sub>4-x</sub> | 420 mAh g <sup>-1</sup> at 1 A g <sup>-1</sup>      | 400% retention<br>after 60000 cycles | This work |
| Zn//V <sub>2</sub> O <sub>5</sub>      | 224 mAh g <sup>-1</sup> at 0.1 A<br>g <sup>-1</sup> | 81.% retention<br>after 30 cycles    | 12        |
| Zn//Co <sub>3</sub> O <sub>4</sub>     | 168 mAh g <sup>-1</sup> at 1 A g <sup>-1</sup>      | 80% retention                        | 7         |

|                                                                 |                                                        |                                       |    |
|-----------------------------------------------------------------|--------------------------------------------------------|---------------------------------------|----|
|                                                                 | 1                                                      | after 2000 cycles                     |    |
| Zn// $\alpha$ -MnO <sub>2</sub>                                 | 382.2 mAh g <sup>-1</sup> at<br>0.3 A g <sup>-1</sup>  | 94% retention<br>after 3000 cycles    | 35 |
| Zn//ZnMn <sub>2</sub> O <sub>4</sub>                            | 150 mAh g <sup>-1</sup> at<br>0.5 A g <sup>-1</sup>    | 94% retention<br>after 500 cycles     | 36 |
| Zn//VS <sub>2</sub>                                             | 190.3 mAh g <sup>-1</sup> at<br>0.05 A g <sup>-1</sup> | 98.0% retention<br>after 200 cycles   | 37 |
| Zn//PANI-MnO <sub>2</sub>                                       | 280 mAh g <sup>-1</sup> at<br>0.2 A g <sup>-1</sup>    | 40% retention<br>after 5000 cycles    | 38 |
| Zn//Co(III) rich-<br>Co <sub>3</sub> O <sub>4</sub>             | 205 mAh g <sup>-1</sup> at<br>0.5 A g <sup>-1</sup>    | 92% retention<br>after<br>5000 cycles | 10 |
| Zn//Na <sub>1.1</sub> V <sub>3</sub> O <sub>7.9</sub> @rGO      | 220 mAh g <sup>-1</sup> at<br>0.3 A g <sup>-1</sup>    | 93% retention<br>after 100 cycles     | 39 |
| Zn//Na <sub>0.95</sub> MnO <sub>2</sub>                         | 60 mAh g <sup>-1</sup> at<br>2C                        | 92% retention<br>after 1000 cycles    | 40 |
| Zinc/Aluminum Ion<br>Battery                                    | 94 mAh g <sup>-1</sup> at<br>0.1 A g <sup>-1</sup>     | 94% retention<br>after 200 cycles     | 41 |
| Zn//MnO <sub>2</sub>                                            | 366.6 mAh g <sup>-1</sup> at<br>0.74 A g <sup>-1</sup> | 83.7% retention<br>after 300 cycles   | 46 |
| Zn//NiO                                                         | 155 mAh g <sup>-1</sup> at 1 A g <sup>-1</sup><br>1    | 65% retention<br>after 500 cycles     | 11 |
| Zn//H <sub>2</sub> V <sub>3</sub> O <sub>8</sub><br>NW/graphene | 394 mAh g <sup>-1</sup> at 1/3C                        | 87% retention<br>after 500 cycles     | 47 |
| Zn//Co <sub>3</sub> O <sub>4</sub> @NiO                         | 182.6 mAh g <sup>-1</sup> at<br>5 mA cm <sup>-2</sup>  | 89% retention<br>after 500 cycles     | 48 |
| Zn//Ni                                                          | 346 mAh g <sup>-1</sup> at 5<br>A g <sup>-1</sup>      | 88% retention<br>after 5000 cycles    | 8  |
| Zn//NiCo <sub>2</sub> O <sub>4</sub>                            | 183.1 mAh g <sup>-1</sup> at<br>1.6 A g <sup>-1</sup>  | 82.7% retention<br>after 3500 cycles  | 49 |

## Supplementary Figures

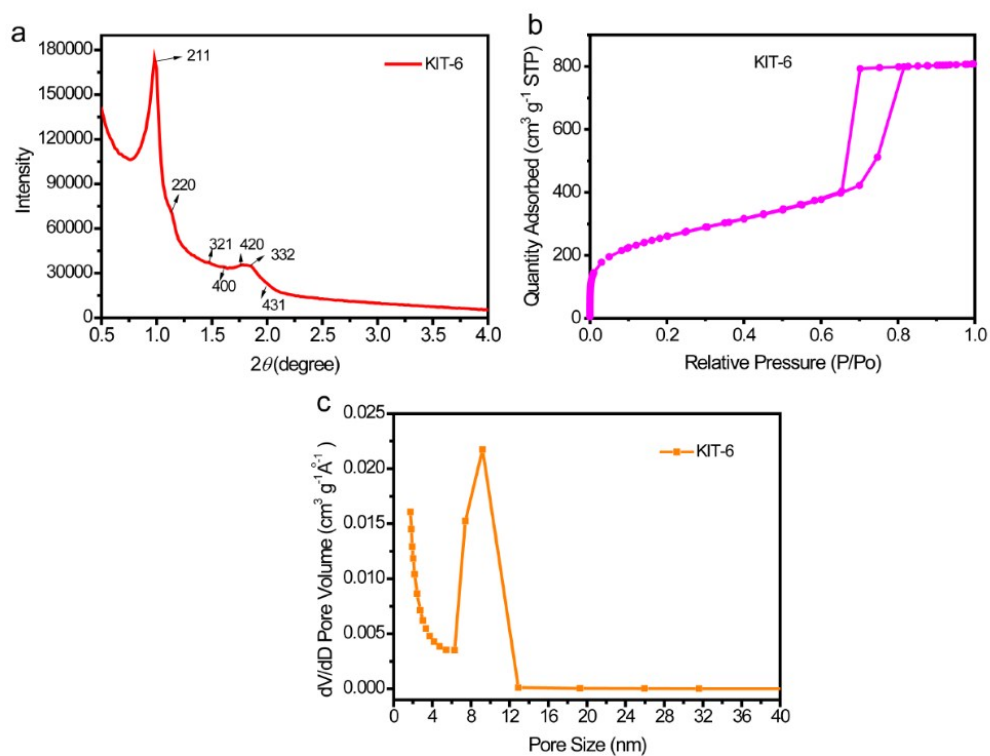

**Fig. S1** XRD patterns, (c)  $N_2$  sorption isotherms, (c) pore size distributions (PSDs) of hard template KIT-6.

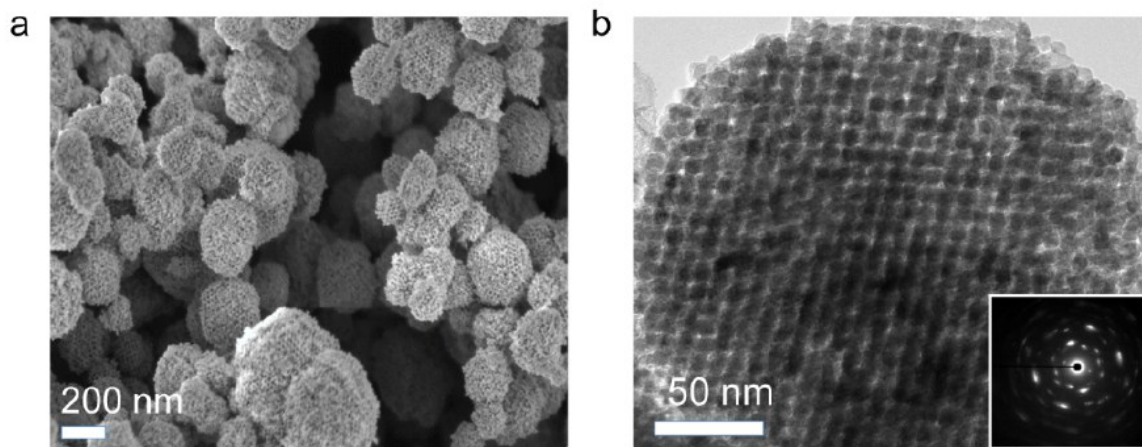

**Fig. S2** (a) SEM and (b) TEM images of the  $M-Co_3O_4$ .

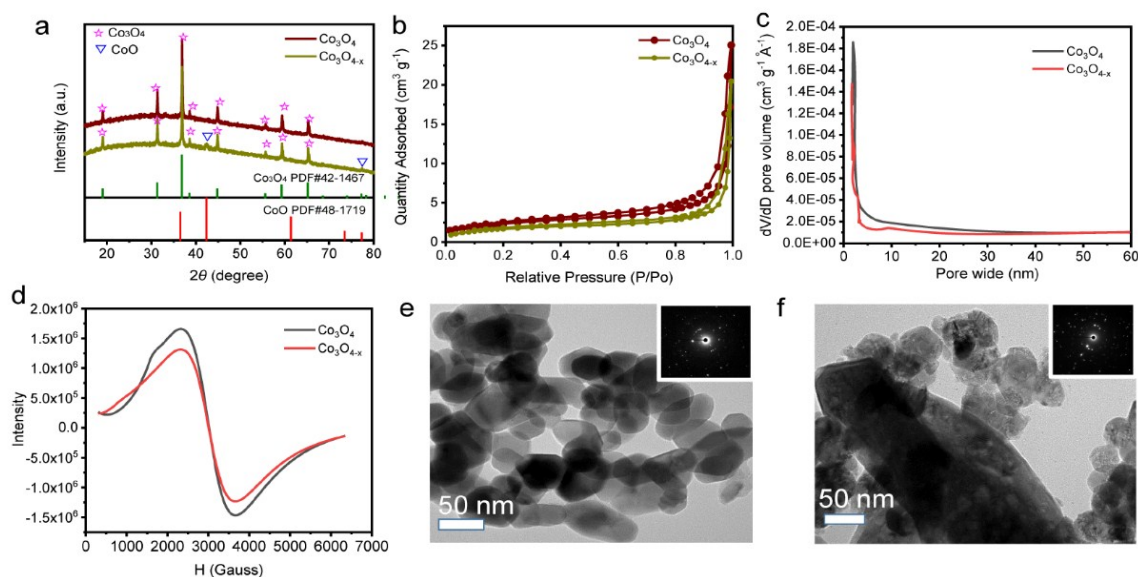

**Fig. S3** The characterizations of no-porous  $\text{Co}_3\text{O}_4$  and no-porous oxygen-vacancy  $\text{Co}_3\text{O}_{4-x}$ , (a) XRD, (b)  $\text{N}_2$  sorption isotherms, (c) pore size distributions (PSDs), (d) EPR spectra and TEM images (e)  $\text{Co}_3\text{O}_4$ , (f)  $\text{Co}_3\text{O}_{4-x}$ .

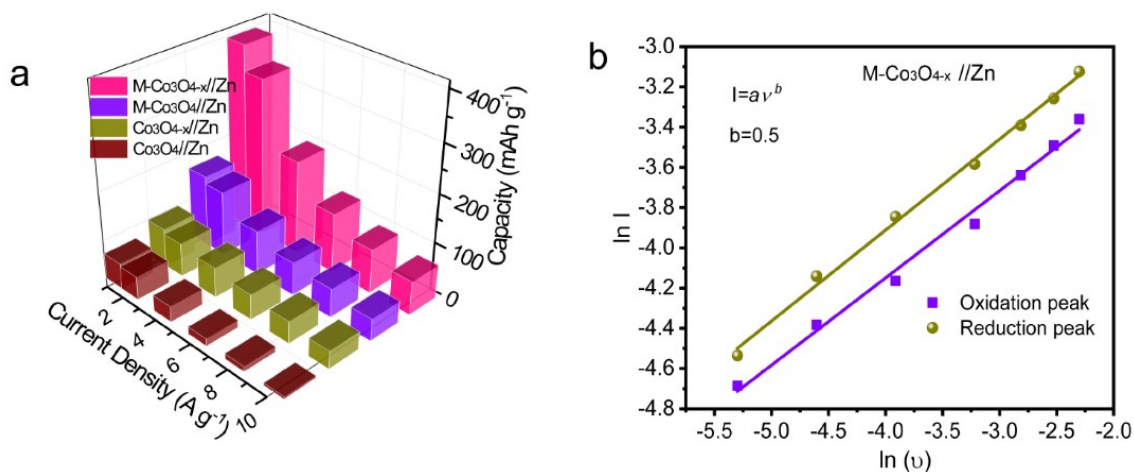

**Fig. S4** (a) The capacity of  $\text{M-Co}_3\text{O}_{4-x} // \text{Zn}$ ,  $\text{M-Co}_3\text{O}_4 // \text{Zn}$ ,  $\text{Co}_3\text{O}_{4-x} // \text{Zn}$  and  $\text{Co}_3\text{O}_4 // \text{Zn}$  batteries at different current densities. (b) The relationship of redox peak currents with the scan rates for  $\text{M-Co}_3\text{O}_{4-x} // \text{Zn}$  battery.

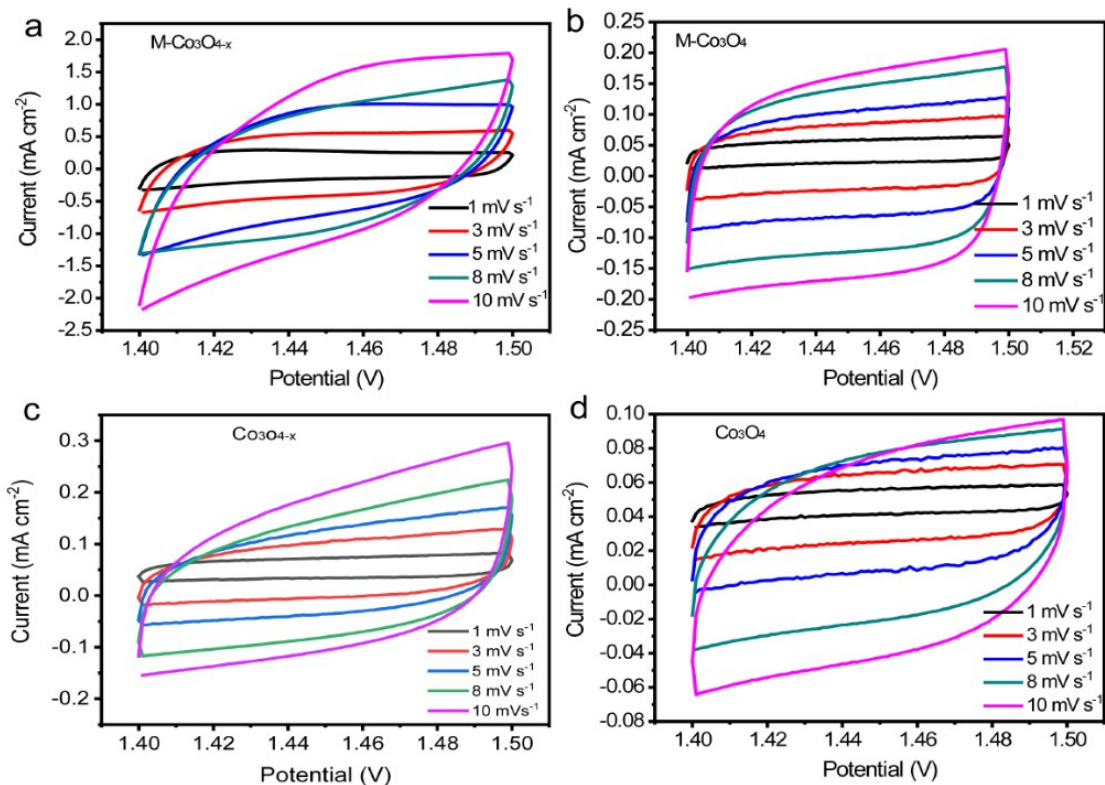

**Fig. S5** Cyclic voltammogram curves were measured in a non-faradaic region of the voltammogram at the different scan rates.

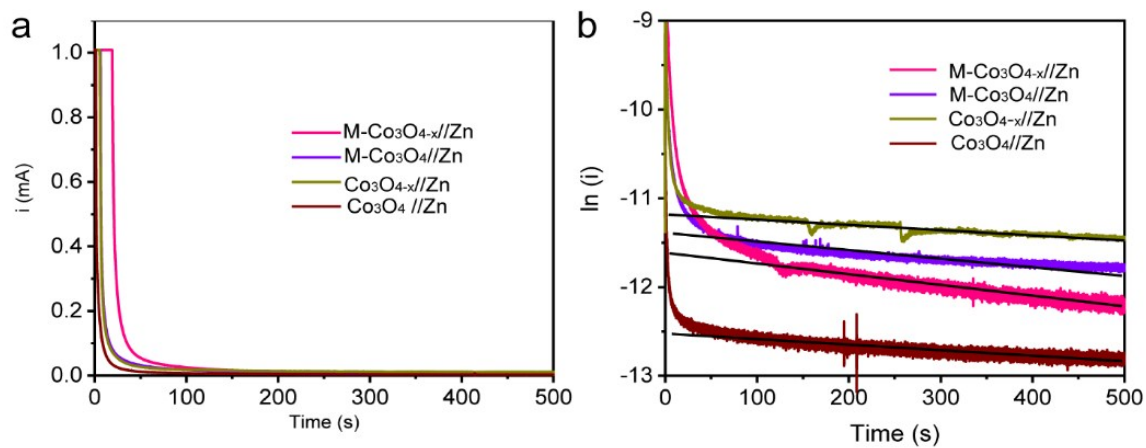

**Fig. S6** (a) Transient *i*-*t* curves of the M-Co<sub>3</sub>O<sub>4-x</sub>//Zn, M-Co<sub>3</sub>O<sub>4</sub>//Zn, Co<sub>3</sub>O<sub>4-x</sub>//Zn and Co<sub>3</sub>O<sub>4</sub>//Zn electrodes collected at 1.72 V, and (b) the corresponding semi-logarithmic plots.

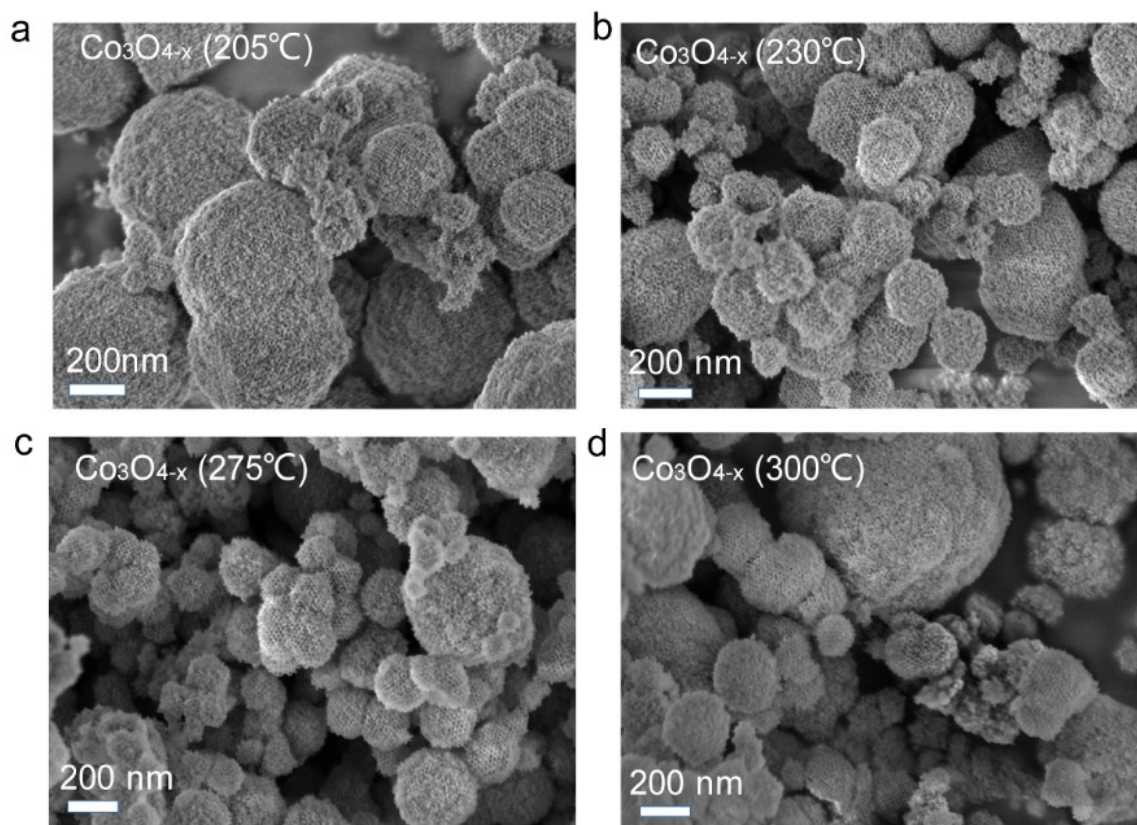

**Fig. S7** SEM images of M-Co<sub>3</sub>O<sub>4-x</sub> (X) at different phosphating temperature.

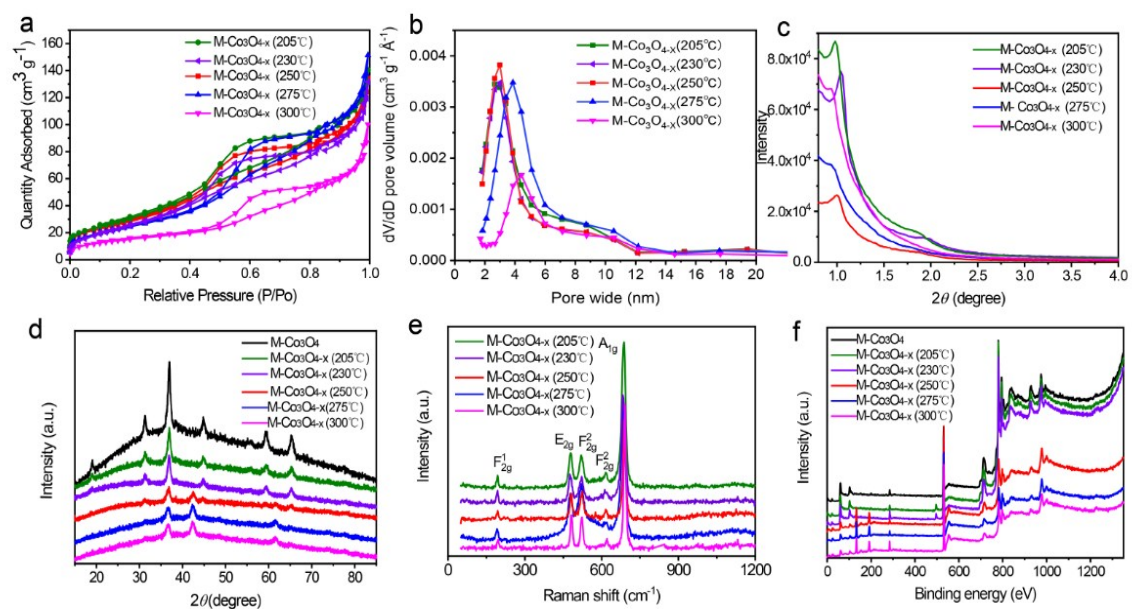

**Fig. S8** The characterizations of M-Co<sub>3</sub>O<sub>4-x</sub> (X) at different phosphating temperature, (a) N<sub>2</sub> sorption isotherms, (b) pore size distributions (PSDs), (c) (d) low-angle and wide-angle powder XRD, (e) Raman shift spectra and (f) XPS spectra.



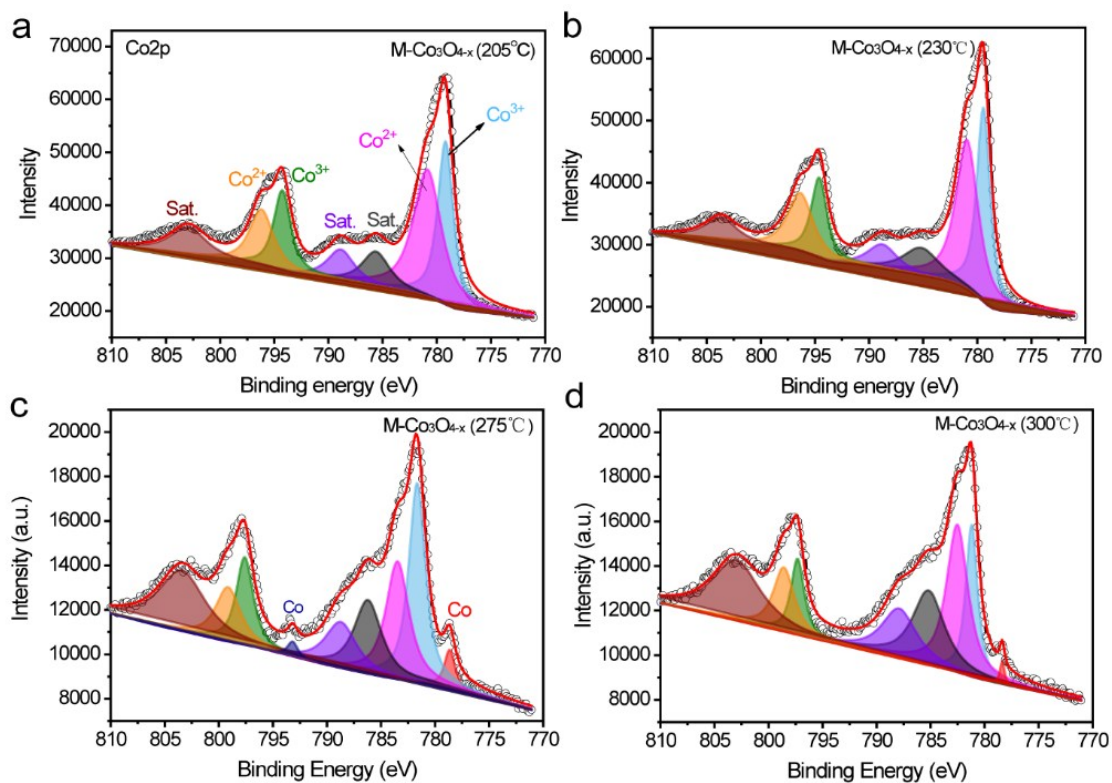

**Fig. S9** The high-resolution XPS spectra of Co 2p for M-Co<sub>3</sub>O<sub>4-x</sub> (X) samples.

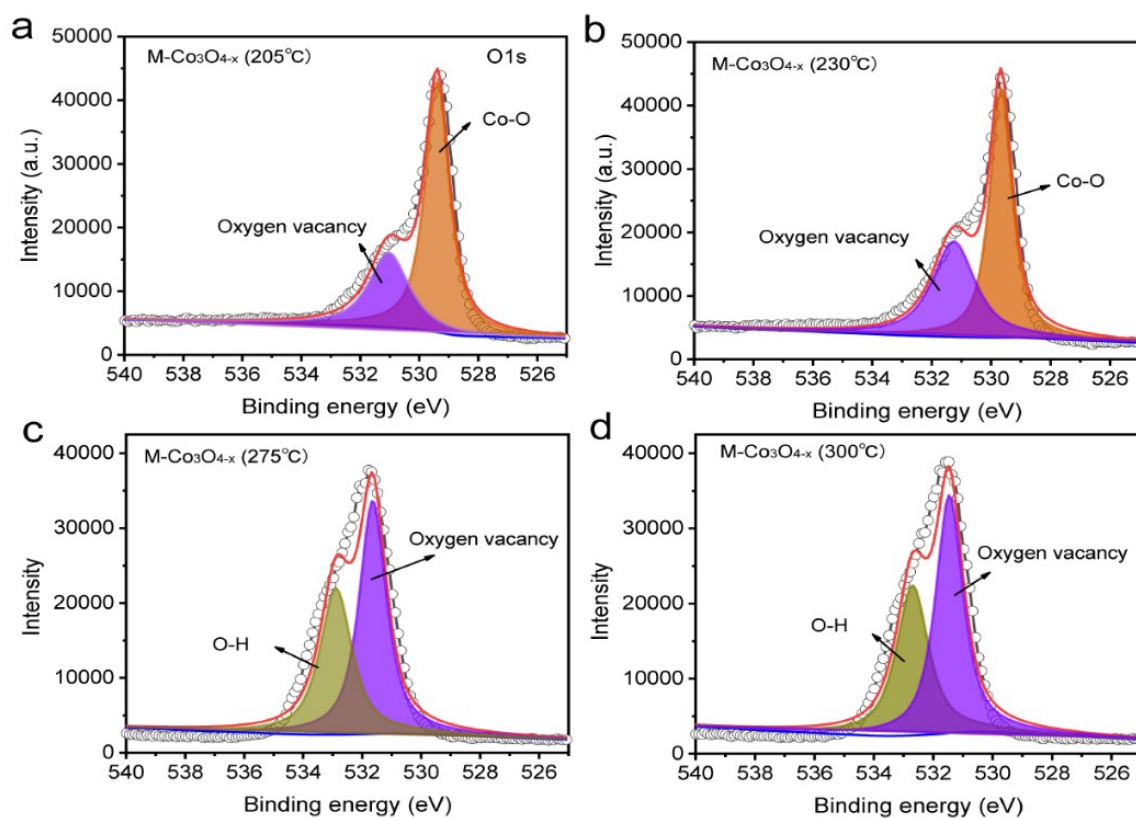

**Fig. S10** The high-resolution XPS spectra of O 1s for M-Co<sub>3</sub>O<sub>4-x</sub> (X) samples.

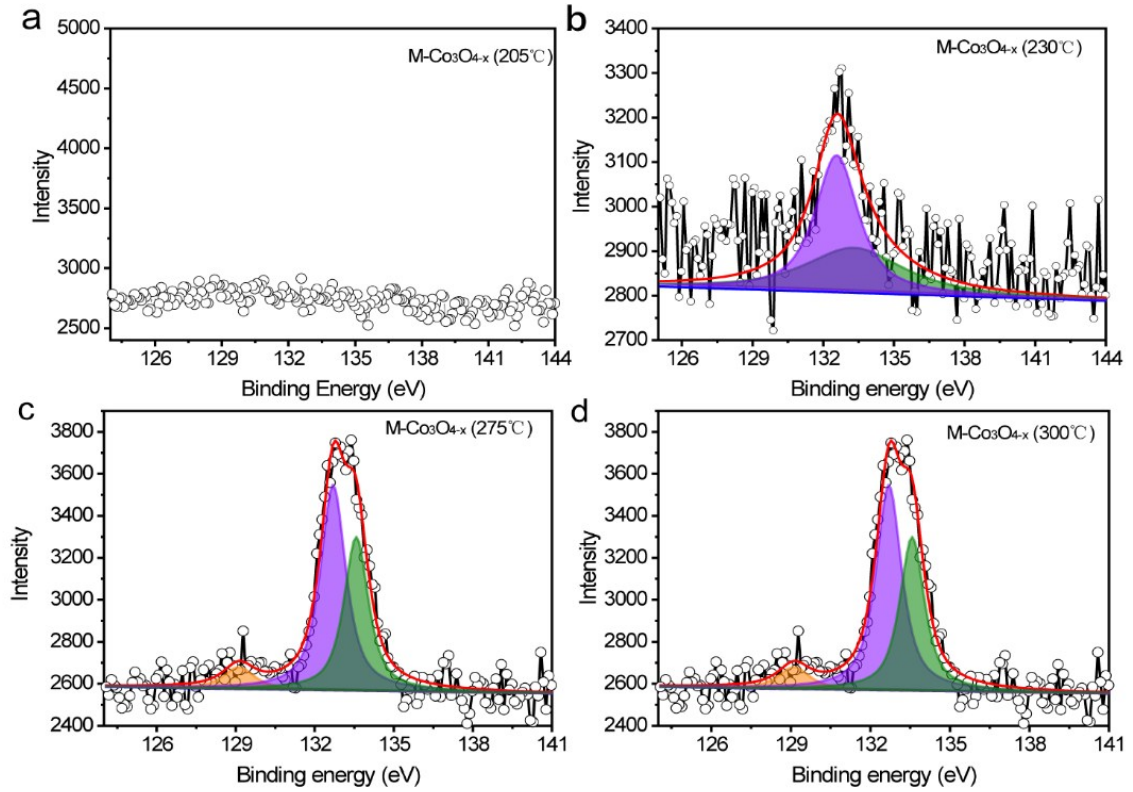

**Fig. S11** The high-resolution XPS spectra of P 2p for M-Co<sub>3</sub>O<sub>4-x</sub> (X) samples.

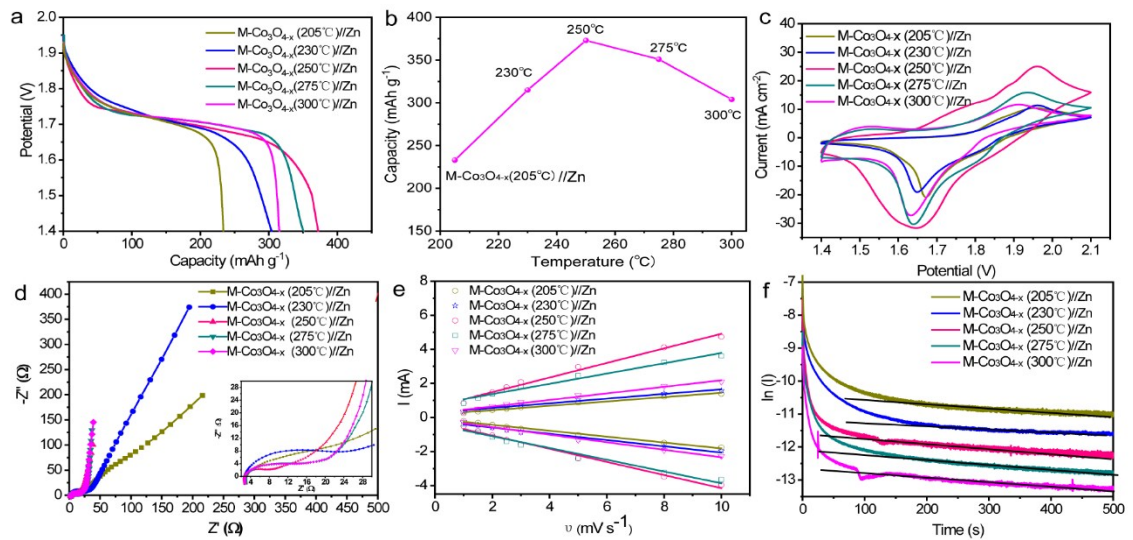

**Fig. S12** The electrochemical performances of M-Co<sub>3</sub>O<sub>4-x</sub> (X)//Zn batteries: (a) the discharge curves at 1 A g<sup>-1</sup>. (b) The capacity of four batteries at 1 A g<sup>-1</sup>. (c) CV curves at 10 mV s<sup>-1</sup>. (d) EIS. (e) The fitted electrochemical double-layer capacitance  $C_{dl}$  by the slope of  $i_c = v C_{dl}$  at 1.45 V. (f) The semi-logarithmic plots of transient  $i-t$  curves of the M-Co<sub>3</sub>O<sub>4-x</sub> (X) electrodes collected at 1.72 V.

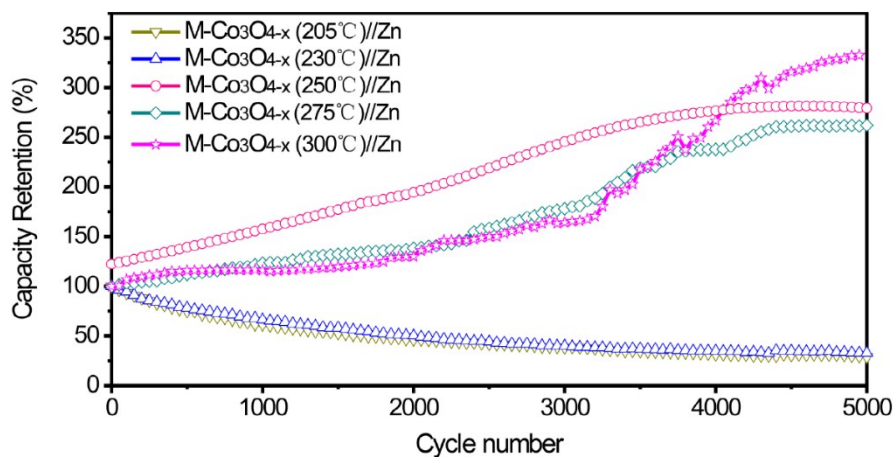

**Fig. S13** Cycling performance of  $M\text{-Co}_3\text{O}_{4-x}$  (X)//Zn batteries at  $5 \text{ A g}^{-1}$ .

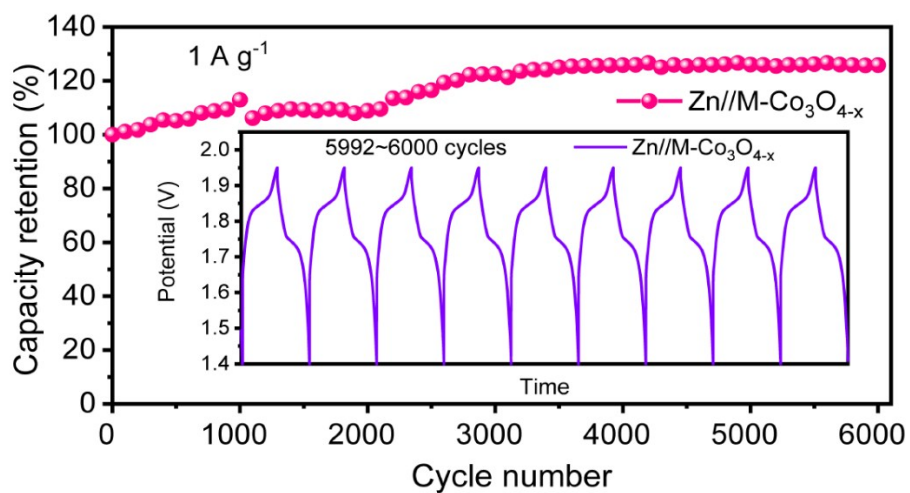

**Fig. S14** Cycling performance of  $M\text{-Co}_3\text{O}_{4-x}$  //Zn battery at  $1 \text{ A g}^{-1}$ .

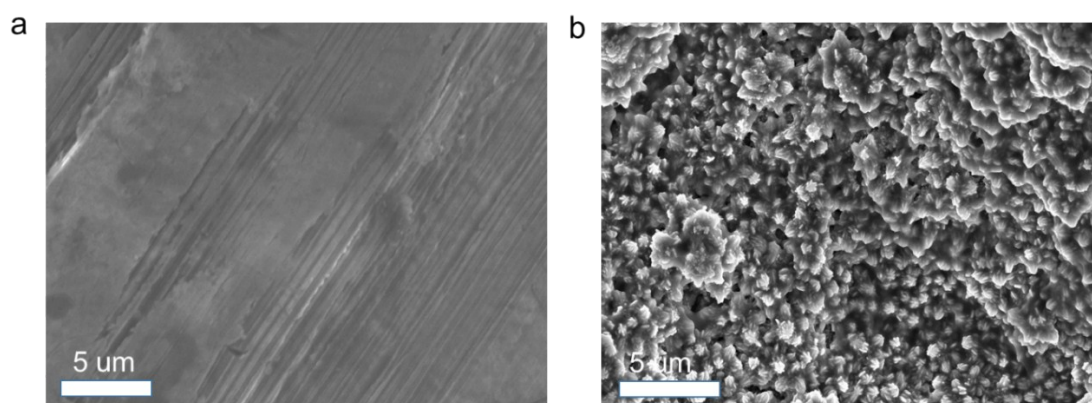

**Fig. S15** The SEM images of Zn anode before (a) and after cycle (b).

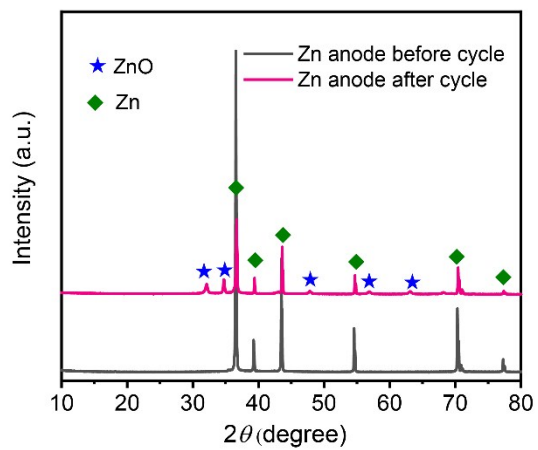

**Fig. S16** The XRD patterns of Zn anode before and after cycle.

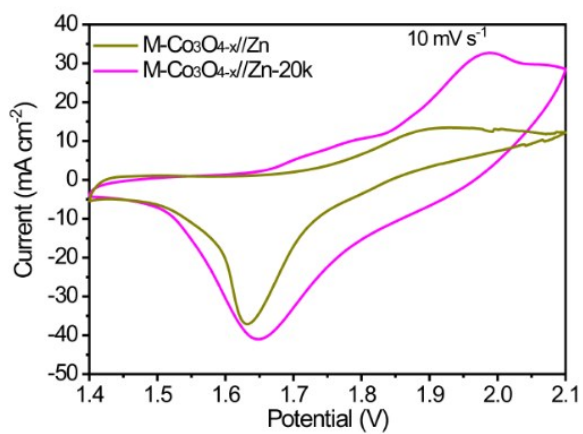

**Fig. S17** The CV curves of  $M\text{-Co}_3\text{O}_{4-x}/\text{Zn}$  battery before and after 20000 cycles

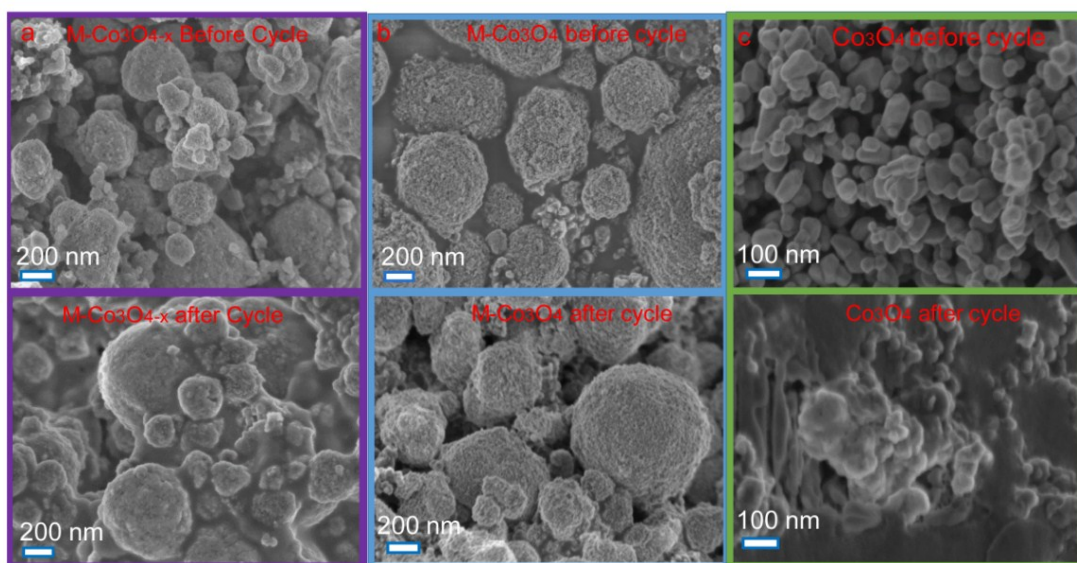

**Fig. S18** The SEM images of M-Co<sub>3</sub>O<sub>4-x</sub>, M-Co<sub>3</sub>O<sub>4</sub> and Co<sub>3</sub>O<sub>4</sub> electrodes before and after cycles.

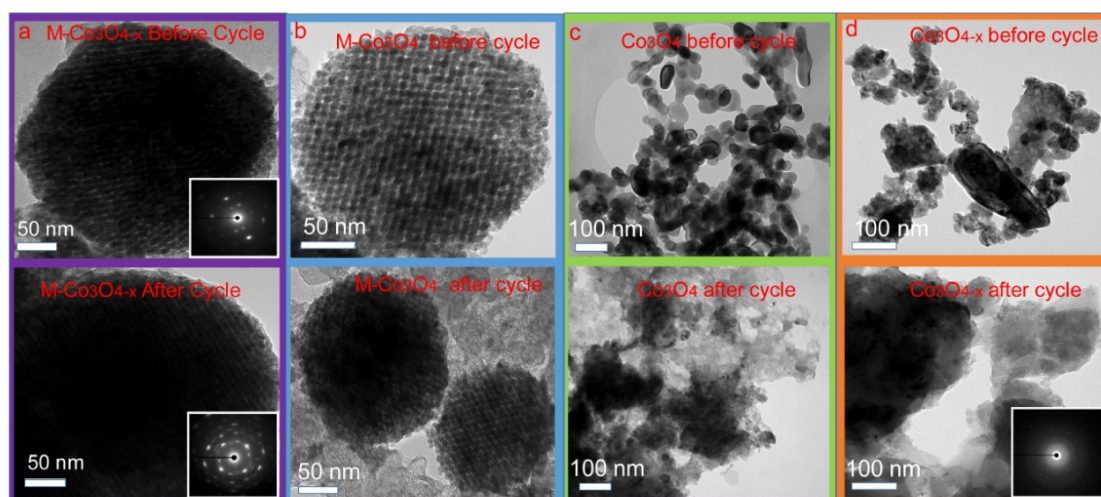

**Fig. S19** The TEM images of M-Co<sub>3</sub>O<sub>4-x</sub>, M-Co<sub>3</sub>O<sub>4-x</sub>, Co<sub>3</sub>O<sub>4</sub> and Co<sub>3</sub>O<sub>4-x</sub> electrodes before and after cycles.

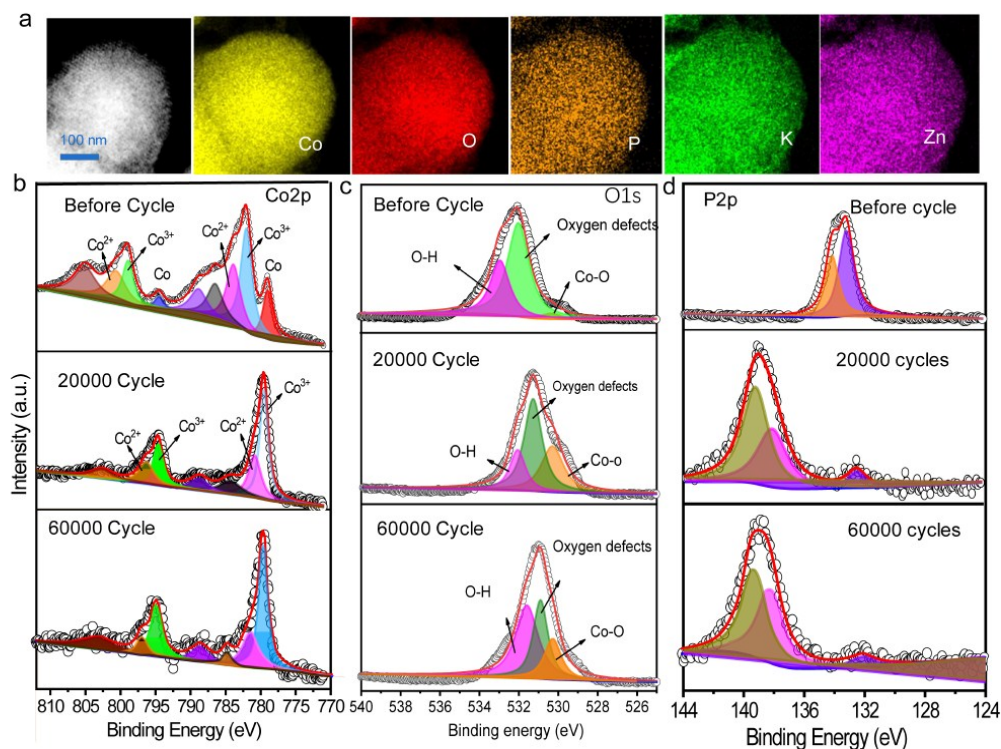

**Fig. S20** (a) High-angle annular dark-field scanning TEM (HAADF-STEM) of M-Co<sub>3</sub>O<sub>4-x</sub> electrode after cycles and its corresponding elementals color mapping. And their corresponding high-resolution XPS spectra of Co 2p (b), O 1s (c) and P 2p (d) peaks of before cycle, 20000 cycles and 60000 cycles.

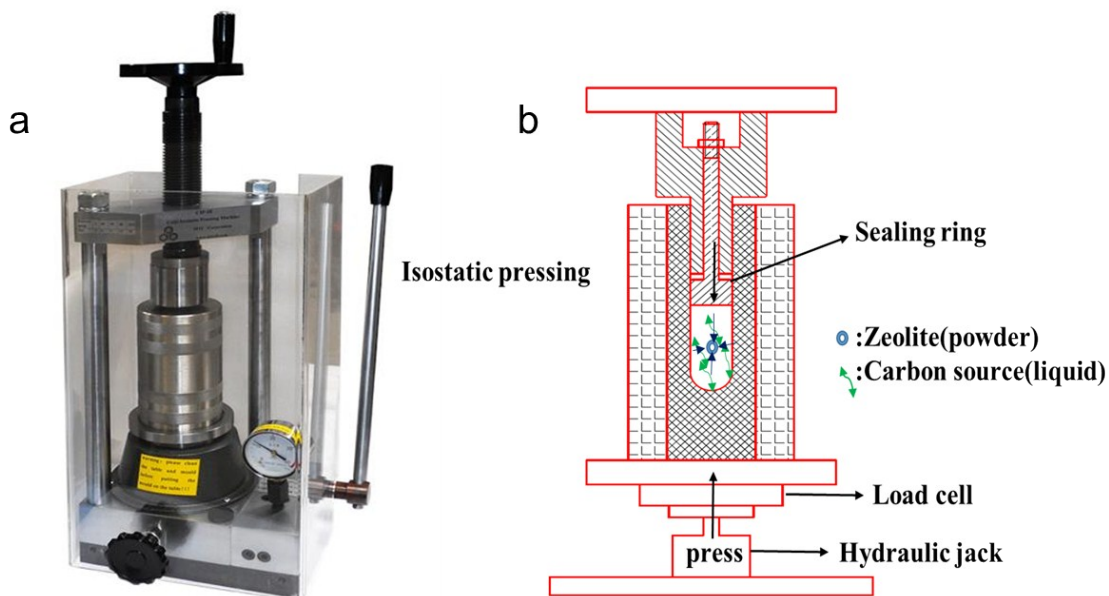

**Fig. S21** (a) The picture of isostatic-pressing equipment, (b) the simple sketch of pressure cell.
